# Supplementary material for: IMG/VR v.2.0: an integrated data management and analysis system for cultivated and environmental viral genomes
Source: PubMed Central journal article supplement (PMC6323928; doi:10.1093/nar/gky1127), 2018-11-08
Supplement: gky1127_supplemental_files.pdf [file gky1127_supplemental_files.pdf]

**Supplementary Figure S2. Locations to bulk download IMG/VR v.2.0 data.** The content of this database can be accessed from (A) the JGI Genome Portals [https://genome.jgi.doe.gov/portal/pages/dynamicOrganismDownload.jsf?organism=IMG\\_VR](https://genome.jgi.doe.gov/portal/pages/dynamicOrganismDownload.jsf?organism=IMG_VR) directly or via *Globus Web Application* or (B) the IMG/VR web link: <https://img.jgi.doe.gov/vr>.

(A)

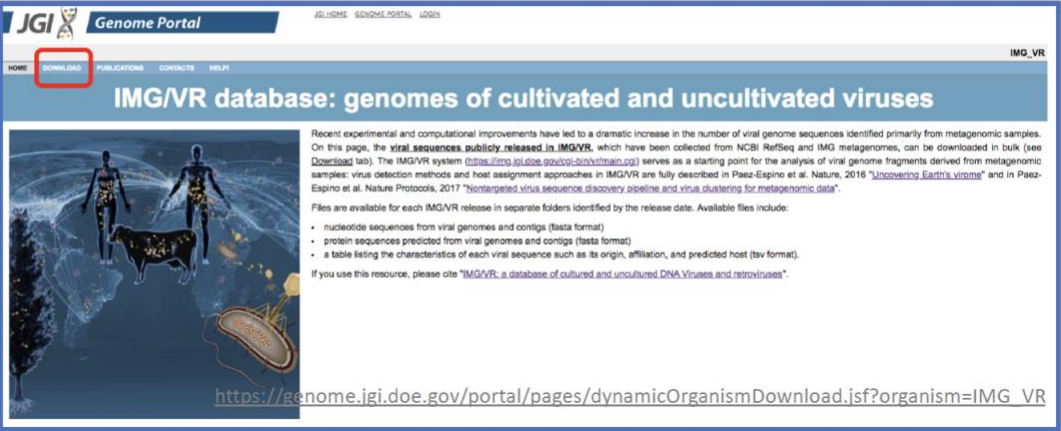

(B)



<https://img.jgi.doe.gov/vr>

|                   |       |               |        |                 |        |                            |      |
|-------------------|-------|---------------|--------|-----------------|--------|----------------------------|------|
| Engineered        | 39950 | Environmental | 551829 | Host-associated | 110562 | Habitat Type               | 7392 |
| Bioreactor        | 2624  | Air           | 110    | Algae           | 2431   | Air                        | 10   |
| Bioremediation    | 2113  | Aquatic       | 520535 | Animal          | 2772   | Aquatic(sediment)          | 178  |
| Biotransformation | 1331  | Terrestrial   | 29274  | Annelida        | 303    | Engineered                 | 1358 |
| Built environment | 8832  | Unclassified  | 4      | Arthropoda      | 573    | Freshwater                 | 841  |
| Food production   | 20    |               |        | Birds           | 553    | Host-associated(human)     | 2090 |
| Lab enrichment    | 1205  |               |        | Cnidaria        | 118    | Host-associated(other)     | 440  |
| Lab synthesis     | 92    |               |        | Echinodermata   | 11     | Host-associated(plants)    | 319  |
| Modeled           | 99    |               |        | Fish            | 200    | Marine                     | 922  |
| Solid waste       | 9742  |               |        | Fungi           | 1588   | Non-                       | 194  |
| Unclassified      | 0     |               |        | Human           | 81279  | marine_Saline_and_Alkaline | 88   |
| Wastewater        | 20789 |               |        | Insecta         | 358    | Terrestrial(other)         | 88   |
|                   |       |               |        | Invertebrates   | 317    | Terrestrial(soil)          | 807  |
